# Supplementary material for: Meta-transcriptomic discovery of a divergent circovirus and a chaphamaparvovirus in captive reptiles with proliferative respiratory syndrome
Source: bioRxiv or medRxiv preprint supplement (doi:10.1101/2020.08.24.264143), 2020-08-24
Supplement: Supplementary file [file media-1.pdf]

**Table S1.** Presentation, pathology in the central bearded dragon morbidity and mortality event, 2014.

| <b>Case ID</b> | <b>Signal ment</b> | <b>Gross lesions</b>                                                                                                                                 | <b>Proliferative respiratory Epithelium</b> | <b>Pneum onia I/N</b> | <b>Eosinophilic Cytoplasmic IB</b> |
|----------------|--------------------|------------------------------------------------------------------------------------------------------------------------------------------------------|---------------------------------------------|-----------------------|------------------------------------|
| 10043.1        | Male/Adult         | Miliary white hepatic foci. Pleural petechiae, pulmonary congestion, mucoid yellow exudate in mesobronchus.<br>Small testes.<br>Fair body condition. | 4D                                          | 4D/2F                 | Lung, kidney, liver                |
| 10043.2        | Female /Adult      | Mottled hepatic parenchyma. Pulmonary congestion.<br>Multifocal haemorrhagic ova.<br>Fair body condition.                                            | 1D                                          | 2MF/2 MF              | Liver                              |
| 10043.3        | Female /Adult      | Multifocal haemorrhagic ova.<br>Good body condition                                                                                                  | 1D                                          | 3D/0                  | 0                                  |
| 10043.4        | Male/Adult         | Dehydrated. Hepatic atrophy. Blood surrounding bolus of food in large intestine. Small testes.<br>Poor body condition.                               | 4D<br>Binucleate cells and syncytia         | 1D/1D                 | Lung, kidney, liver                |
| 10043.5        | Female /Adult      | Mottled hepatic parenchyma. Pulmonary congestion and unilateral mesobronchial blood clot. Small ova.<br>Poor body condition.                         | 3D                                          | 3D/3D                 | Lung, nerve cell body              |

Proliferation of respiratory epithelium graded on a scale of 0-4 in ascending severity. Inflammation (I) graded on a scale of 0-4 in ascending severity. Necrosis (N) graded on a scale of 0-4 in ascending severity. D – diffuse, S – segmental, MF – multifocal, F – focal tracts. IB: inclusion bodies.
